# Supplementary material for: Community surveillance and response to maternal and child deaths in low- and middle-income countries: A scoping review
Source: PubMed Central journal article supplement (PMC7963102; doi:10.1371/journal.pone.0248143), 2021-03-16
Supplement: pone.0248143.s002.pdf [file pone.0248143.s002.pdf]

## S1 Table: Search strategy

**Population:** Women who died while pregnant or after delivery and children who died under the age of five years

**Intervention:** Identification and notification of maternal and under-five deaths by a community health worker; and conducting verbal and social autopsy with family members and neighbours in the community to ascertain causes and contributing factors respectively

**Comparator:** None

**Outcome:** Maternal and under-deaths identified and investigated

**Study design:** Any type of study design

| Set | Search terms                                 | Hits   |
|-----|----------------------------------------------|--------|
| 1   | Verbal autopsy                               | 966    |
| 2   | Social autopsy                               | 1118   |
| 3   | Death review                                 | 128279 |
| 4   | Community death review                       | 4123   |
| 5   | Community-based death surveillance           | 5152   |
| 6   | Community notification                       | 39     |
| 7   | Death audits                                 | 44     |
| 8   | Confidentiality enquiry                      | 426    |
| 9   | 1 OR 2 OR 3 OR 4 OR 5 OR 6 OR 7              | 134509 |
| 10  | Maternal deaths                              | 23010  |
| 11  | Maternal mortality                           | 39368  |
| 12  | 10 OR 11                                     | 51075  |
| 13  | Under-five mortality                         | 1682   |
| 14  | Under-five deaths                            | 1069   |
| 15  | Under-5 deaths                               | 1305   |
| 16  | Infant mortality                             | 115994 |
| 17  | Infant deaths                                | 79454  |
| 18  | Child mortality                              | 125412 |
| 19  | Child death                                  | 67626  |
| 20  | Neonatal deaths                              | 19312  |
| 21  | 13 OR 14 OR 15 OR 16 OR 17 OR 18 OR 19 OR 20 | 122834 |
| 14  | 12 AND 21                                    | 15865  |
| 15  | 9 AND 14                                     | 3002   |
| 16  | Lay Health Workers                           | 278    |
| 17  | Community Health Workers                     | 23420  |
| 18  | Lay Interviewers                             | 278    |
| 19  | 16 OR 17 OR 18                               | 25360  |
| 20  | 15 AND 19                                    | 72     |
