# Supplementary material for: Community surveillance and response to maternal and child deaths in low- and middle-income countries: A scoping review
Source: PubMed Central journal article supplement (PMC7963102; doi:10.1371/journal.pone.0248143), 2021-03-16
Supplement: pone.0248143.s003.pdf [file pone.0248143.s003.pdf]

**S2 Table: Descriptive information for each study included in the scoping review**

| Author (Year); Country             | Definition of mortality measures                                                                                                                                                                                | Direction of enquiry | Recall period | Data collection tool | Framework for classification of avoidable factors of death | Quality assurance method                                                | Effects                                                                                                                        | Causes of death and avoidable factors                                                                                        | Limitations and challenges                                                                                                             |
|------------------------------------|-----------------------------------------------------------------------------------------------------------------------------------------------------------------------------------------------------------------|----------------------|---------------|----------------------|------------------------------------------------------------|-------------------------------------------------------------------------|--------------------------------------------------------------------------------------------------------------------------------|------------------------------------------------------------------------------------------------------------------------------|----------------------------------------------------------------------------------------------------------------------------------------|
| Negandhi et al., [56]<br><br>India | All women who die within nine months of registering for antenatal care or within 2 months of registering for postnatal care.<br><br>The standard case definition of the WHO used to categorise perinatal deaths | Prospective          | Not specified | Not specified        | Not specified                                              | Reporting from multiple sources reduced the likelihood of missed deaths | Review system facilitated supportive supervision<br><br>Provided village level data needed to make programmatic decisions      | -                                                                                                                            | Review system facilitated supportive supervision<br><br>Provided village level data needed to make programmatic decisions              |
| Dikid et al., [25]<br><br>India    | Not reported                                                                                                                                                                                                    | Prospective          | Not specified | Not specified        | Pathway analysis;<br>Three delays model                    | -                                                                       | Inclusion of multiple stakeholders including policy makers has resulted in greater attention to issues that were not solely in | Haemorrhage was the most common cause of death<br><br>Eclampsia was the second most common cause of death followed by sepsis | MAPEDIR model in its present form was found not to have clearly defined channels for disseminating information to various stakeholders |

|                           |              |             |           |                                                     |                                      |                                                                                       |                                 |                                                                                                                                                                                                                    |   |
|---------------------------|--------------|-------------|-----------|-----------------------------------------------------|--------------------------------------|---------------------------------------------------------------------------------------|---------------------------------|--------------------------------------------------------------------------------------------------------------------------------------------------------------------------------------------------------------------|---|
|                           |              |             |           |                                                     |                                      |                                                                                       | the domain of the health sector | <p>54% of the delays could be attributed to delay in deciding to seek care for an obstetric complication</p> <p>30% delay in coordinating transport</p> <p>16% delay in obtaining care</p>                         |   |
| Rai et al., [42]<br>India | Not reported | Prospective | 2-6 weeks | Ballabgarh VA tool; INDEPTH- WHO Social autopsy too | Three delays model; Pathway analysis | Randomly selected households were revisited by health supervisors and medical doctors | -                               | <p>Most common cause of neonatal deaths was birth asphyxia (31.5%), low birth weight (26.5%) sepsis or pneumonia (16.9%), congenital anomaly (9.3%)</p> <p>Among post-neonatal deaths pneumonia (28.9%), other</p> | - |

|                                      |              |             |               |                                                          |                    |                                                                                                                                                                |   |                                                                                                                                                  |                                                                                                                                                                                                                                   |
|--------------------------------------|--------------|-------------|---------------|----------------------------------------------------------|--------------------|----------------------------------------------------------------------------------------------------------------------------------------------------------------|---|--------------------------------------------------------------------------------------------------------------------------------------------------|-----------------------------------------------------------------------------------------------------------------------------------------------------------------------------------------------------------------------------------|
|                                      |              |             |               |                                                          |                    |                                                                                                                                                                |   | infection and sepsis (13.6%); diarrhoea (15.3%)<br><br>Delay at any level was observed in 50% of neonatal deaths and 41% of post-neonatal deaths |                                                                                                                                                                                                                                   |
| Singh et al., [44]<br><br>India      | Not reported | Prospective | 3 weeks       | The government of India standardised verbal autopsy tool | Three delays model | Senior public health officer regularly sensitized staff at peripheral centres regarding importance of listing every female death and suspected maternal deaths | - | -                                                                                                                                                | Underreporting of abortion-related maternal deaths especially illegal or in early antenatal period could be missed<br><br>No reporting from primary health centres was observed which staff attributed to fear of punitive action |
| Biswas et al., [7]<br><br>Bangladesh | Not reported | Prospective | Not specified | Verbal autopsy questionnaire                             | Not specified      |                                                                                                                                                                |   | Family had delayed in decision making to seek treatment before death<br><br>There was delay in decision                                          | Presence of community leaders biased discussions                                                                                                                                                                                  |

|                                              |              |             |               |                                      |               |                                                                                                                                                                                                                                                                                                       |  |                                                                                                                                                                                                                                 |  |
|----------------------------------------------|--------------|-------------|---------------|--------------------------------------|---------------|-------------------------------------------------------------------------------------------------------------------------------------------------------------------------------------------------------------------------------------------------------------------------------------------------------|--|---------------------------------------------------------------------------------------------------------------------------------------------------------------------------------------------------------------------------------|--|
|                                              |              |             |               |                                      |               |                                                                                                                                                                                                                                                                                                       |  | <p>making to transfer the mother immediately to referral facility</p> <p>Majority of the mothers were found with high blood pressure, blurring vision, swelling of the face and leg</p> <p>Majority of mothers had bleeding</p> |  |
| <p>Biswas et al., [16]</p> <p>Bangladesh</p> | Not reported | Prospective | 15-30 days    | Social autopsy tool                  | Not specified |                                                                                                                                                                                                                                                                                                       |  |                                                                                                                                                                                                                                 |  |
| <p>Biswas et al., [55]</p> <p>Bangladesh</p> | Not reported | Prospective | Not specified | A structured death notification form | Not specified | <p>Number of deaths, especially maternal deaths fell in Kashipur</p> <p>Upgrading of the community clinic to a ten-bed hospital - based on MDSR committee recommendations</p> <p>ANC is now easily available in the village - a trained community skilled birth attendant was deployed to perform</p> |  | <p>No comparison was made with a geographic area where there is no MNDR</p>                                                                                                                                                     |  |

|                                  |                                                  |             |            |                                                           |                    |                                                                                                                                                                                                                                                                 |  |  |  |
|----------------------------------|--------------------------------------------------|-------------|------------|-----------------------------------------------------------|--------------------|-----------------------------------------------------------------------------------------------------------------------------------------------------------------------------------------------------------------------------------------------------------------|--|--|--|
|                                  |                                                  |             |            |                                                           |                    | antenatal care, normal delivery, and postnatal care at the facility                                                                                                                                                                                             |  |  |  |
| Halim et al., [37]<br>Bangladesh | The standard case definition of the WHO          | Prospective | 15-60 days | WHO-based verbal autopsy tool                             | Three delays model | Supervisor accompanied health workers conducting VA and provided instant feedback<br><br>VA forms were reviewed monthly by supervisors and central investigators<br><br>Family was revisited in case of any inconsistencies to clarify any identified issues    |  |  |  |
| Soofi et al., [9]<br>Pakistan    | The standard case definition of neonate's deaths | Prospective | 2-6 weeks  | WHO-neonatal verbal autopsy tool;<br>Clinical case sheets | Not specified      | A 2-day refresher training for CHWs every 6 months<br>Review meetings<br>Supervisory field visits to ensure adequacy of VA procedures<br>Random 5% of verbal autopsy interviews were attended by the study supervisor to ensure interview procedure and probing |  |  |  |

|                                |                              |               |           |                                     |                    |                                                                                                                                                     |   |                                                                                                                                                                  |                                                                                                                                                                                                                                    |
|--------------------------------|------------------------------|---------------|-----------|-------------------------------------|--------------------|-----------------------------------------------------------------------------------------------------------------------------------------------------|---|------------------------------------------------------------------------------------------------------------------------------------------------------------------|------------------------------------------------------------------------------------------------------------------------------------------------------------------------------------------------------------------------------------|
|                                |                              |               |           |                                     |                    | techniques were being applied<br>2% work of each CHW was verified by a blinded social scientist to ensure that data collected by the CHW is correct |   |                                                                                                                                                                  |                                                                                                                                                                                                                                    |
| Mir et al., [26]<br>Pakistan   | WHO standard case definition | Retrospective | 2 years   | WHO VA questionnaire                | Not specified      | -                                                                                                                                                   | - | Obstetric haemorrhage was the leading cause of death 40% of deaths due to pregnancy-induced hypertension 5% of deaths were due to abortion related complications | Misclassification ; village-based informants had incorrectly classified 3 deaths out of 168 pregnancy-related deaths<br><br>18 of the 169 deaths were identified as eligible pregnancy related deaths when they were false matches |
| Bogale et al., [6]<br>Ethiopia | Not reported                 | Retrospective | 18 months | INDEPTH Network Social autopsy tool | Three delays model | -                                                                                                                                                   | - | Birth asphyxia and bacterial sepsis were the leading causes of death contributing 32.5% of                                                                       | Affected by misclassification bias that might be introduced when trying to differentiate neonatal deaths                                                                                                                           |

|                                                      |                              |             |                |                                     |                  |                                                                                                  |   |                                                                                                                                                                                                           |                                                                                                                                             |
|------------------------------------------------------|------------------------------|-------------|----------------|-------------------------------------|------------------|--------------------------------------------------------------------------------------------------|---|-----------------------------------------------------------------------------------------------------------------------------------------------------------------------------------------------------------|---------------------------------------------------------------------------------------------------------------------------------------------|
|                                                      |                              |             |                |                                     |                  |                                                                                                  |   | <p>deaths, followed by prematurity which contributed 14%</p> <p>For neonates between 1 and 6 and 7-28 days, the major cause of death was bacterial sepsis accounting for 44.4% and 66.7% respectively</p> | <p>from stillbirths during the verbal autopsy</p> <p>A long recall period of 18 months introduces recall bias</p>                           |
| <p>Willcox et al., [39]</p> <p>Mali &amp; Uganda</p> | Not reported                 | Prospective | Within 4 weeks | QUARITE trial questionnaire         | Not specified    | Re-investigated a random sample, cross checking with other sources of information where possible | - | <p>Malnutrition in Mali</p> <p>Child neglect in Uganda</p>                                                                                                                                                | <p>Difficult to follow up implementation of recommendations made to address social factors of child death discussed in village meetings</p> |
| <p>Moshabela et al., [40]</p> <p>Senegal</p>         | WHO standard case definition | Prospective | 1-2 weeks      | MVP standardised VASA tool based on | Pathway analysis | Childcount+ platform with built in reminders was used for data collection, and                   |   | Four of the deaths occurred as a result of haemorrhage                                                                                                                                                    | Small number of deaths identified pose a challenge in                                                                                       |

|                                          |                              |             |               |                     |                    |                                                                                                                                                                                                                                     |                                                                                                                                                                                                                                                  |   |                                                                                                                                                                                                                           |
|------------------------------------------|------------------------------|-------------|---------------|---------------------|--------------------|-------------------------------------------------------------------------------------------------------------------------------------------------------------------------------------------------------------------------------------|--------------------------------------------------------------------------------------------------------------------------------------------------------------------------------------------------------------------------------------------------|---|---------------------------------------------------------------------------------------------------------------------------------------------------------------------------------------------------------------------------|
|                                          |                              |             |               | WHO questionnaire   |                    | <p>monitoring of CHW workload and performance</p> <p>Periodic retraining of CHWs was conducted to optimize accuracy of data collection</p> <p>Clarification was sought from CHWs, clinic staff or household members if required</p> | -                                                                                                                                                                                                                                                |   | calculating Maternal Mortality Ratio                                                                                                                                                                                      |
| <p>Bayley et al., [31]</p> <p>Malawi</p> | WHO standard case definition | Prospective | Not specified | Verbal autopsy form | Three delays model | -                                                                                                                                                                                                                                   | <p>CLMDR process doubled the number of maternal deaths being reviewed with 86% identified maternal deaths being reviewed</p> <p>The process resulted in high rates of completion of community-planned actions (82%), district hospital (67%)</p> | - | <p>System struggled to identify or follow-up maternal deaths of transient workers due to reduced coverage</p> <p>Verbal and social autopsy was not always able to facilitate discussion of sensitive topics including</p> |



|                                   |                                                           |               |         |                                                                   |               |  |                                                                                                                                                                                                   |  |                                                                                                                                                                                                                                                                                                                     |
|-----------------------------------|-----------------------------------------------------------|---------------|---------|-------------------------------------------------------------------|---------------|--|---------------------------------------------------------------------------------------------------------------------------------------------------------------------------------------------------|--|---------------------------------------------------------------------------------------------------------------------------------------------------------------------------------------------------------------------------------------------------------------------------------------------------------------------|
|                                   |                                                           |               |         |                                                                   |               |  | and health centre (65%) actions to prevent maternal deaths<br><br>Community participants reported improved trust in the health system, with potential benefits for uptake of available healthcare |  | abortion or HIV related deaths<br><br>It requires increased staff attendance at health facility CLMNDR meetings<br><br>System relies on CHWs, who have a lot of other responsibilities, to link health services and the community<br>Were HSAs failed to identify families or organise meetings, the process failed |
| Adomako et al., [32]<br><br>Ghana | WHO standard case definition for pregnancy-related deaths | Retrospective | 5 years | RAMOS interview record sheets<br>VA form - Ghana Health Service & | Not specified |  |                                                                                                                                                                                                   |  | Family members only identified 48% of maternal deaths correctly                                                                                                                                                                                                                                                     |

|                                      |                              |             |         | WHO recommendations     |               |                                                                                                                                                                                                                                                                                                    |                                                                                                                                                                                                       |                                                                                                                                                                                                                                                      |                                                                                                                                                                                                                                                                                                                                                                   |
|--------------------------------------|------------------------------|-------------|---------|-------------------------|---------------|----------------------------------------------------------------------------------------------------------------------------------------------------------------------------------------------------------------------------------------------------------------------------------------------------|-------------------------------------------------------------------------------------------------------------------------------------------------------------------------------------------------------|------------------------------------------------------------------------------------------------------------------------------------------------------------------------------------------------------------------------------------------------------|-------------------------------------------------------------------------------------------------------------------------------------------------------------------------------------------------------------------------------------------------------------------------------------------------------------------------------------------------------------------|
| Mgawadere et al., [27]<br><br>Malawi | WHO standard case definition | Prospective | 30 days | WHO Verbal autopsy tool | Not specified | <p>Research staff visited all 46 participating healthcare facilities once a month, cross checked all registers and checked findings with the respective healthcare providers</p> <p>Quarterly review meetings were held with health surveillance assistants to identify any death not reported</p> | <p>The study identified an additional 8 maternal deaths which had occurred at facility level which had not previously been reported and which had occurred in wards other than the maternity ward</p> | <p>Obstetric haemorrhage was the leading cause of death accounting for 47.8%, followed by pregnancy related infections 19.4%, hypertensive disorders in pregnancy, childbirth and the puerperium 16.8% and pregnancy with abortive outcome 13.2%</p> | <p>It was not possible to conduct a verbal autopsy for all deaths of women of reproductive age</p> <p>Reliance on reported symptoms of pregnancy in case-notes, registers and via relatives of the deceased, means that some women with undisclosed or undiagnosed pregnancy as well as those where signs and symptoms were simply not reported/or documented</p> |

|                                      |                              |             |               |                         |                    |                                                                                                                                                                                                                                                                                                    |   |                                                                                                                                                                                                                                                                                                             |                        |
|--------------------------------------|------------------------------|-------------|---------------|-------------------------|--------------------|----------------------------------------------------------------------------------------------------------------------------------------------------------------------------------------------------------------------------------------------------------------------------------------------------|---|-------------------------------------------------------------------------------------------------------------------------------------------------------------------------------------------------------------------------------------------------------------------------------------------------------------|------------------------|
|                                      |                              |             |               |                         |                    |                                                                                                                                                                                                                                                                                                    |   |                                                                                                                                                                                                                                                                                                             | could have been missed |
| Mgawadere et al., [28]<br><br>Malawi | WHO standard case definition | Prospective | Not specified | WHO Verbal autopsy tool | Three delays model | <p>Research staff visited all 46 participating healthcare facilities once a month, cross checked all registers and checked findings with the respective healthcare providers</p> <p>Quarterly review meetings were held with health surveillance assistants to identify any death not reported</p> | - | <p>94.7% of women had had delayed treatment on admission<br/>Shortage of equipment, drugs and supplies was the second most frequent cause of type 3 delays (63.1%)</p> <p>20 out of 28 maternal deaths were associated with healthcare provider factors which were avoidable and administrative failure</p> | -                      |

|                                          |                                                                                                                                 |             |               |                         |               |   |                                                                                                                                                                                                                                                                                                            |   |                                                                                                                                                                                                                                                                                                         |
|------------------------------------------|---------------------------------------------------------------------------------------------------------------------------------|-------------|---------------|-------------------------|---------------|---|------------------------------------------------------------------------------------------------------------------------------------------------------------------------------------------------------------------------------------------------------------------------------------------------------------|---|---------------------------------------------------------------------------------------------------------------------------------------------------------------------------------------------------------------------------------------------------------------------------------------------------------|
| Zaba et al., [52]<br>Multi-country study | All deaths in pregnant or postpartum women (up to 42 days postpartum) – did not exclude cases that are incidental to pregnancy) | Prospective | Not specified | WHO Verbal autopsy tool | Not specified | - | Of the 235 pregnancy related deaths, 40(17%) were identified as pregnancy related by both VA data and demographic surveillance data<br><br>144 (61.3%) were identified as pregnancy-related based on VA reports alone, and the remaining 51 (21.7%) were identified through demographic surveillance only) | - | 27.6% of the data in the dataset did not have an associated VA, might have missed some pregnancy related deaths<br><br>Studies that undertake demographic surveillance with intervals longer than 6 months would not intersect with all times during which women would recognise that they are pregnant |
|------------------------------------------|---------------------------------------------------------------------------------------------------------------------------------|-------------|---------------|-------------------------|---------------|---|------------------------------------------------------------------------------------------------------------------------------------------------------------------------------------------------------------------------------------------------------------------------------------------------------------|---|---------------------------------------------------------------------------------------------------------------------------------------------------------------------------------------------------------------------------------------------------------------------------------------------------------|

|                                  |                                                |               |                                                     |                                        |               |                                          |               |                                                                                                                                                                                                                                                                                            |                                                                                      |
|----------------------------------|------------------------------------------------|---------------|-----------------------------------------------------|----------------------------------------|---------------|------------------------------------------|---------------|--------------------------------------------------------------------------------------------------------------------------------------------------------------------------------------------------------------------------------------------------------------------------------------------|--------------------------------------------------------------------------------------|
| Kakoty et al., [46]<br><br>India | Definition of neonatal mortality not specified | Prospective   | VA conducted within a month of reported death       | Predesigned pretested VA questionnaire | Not specified | Not specified                            | Not specified | Pneumonia and septicaemia accounted for 47.7% of death followed by asphyxia and respiratory distress syndrome. 25% of newborn babies had LBW or prematurity. Complicated or prolonged labour was reported in about 46 % deliveries. Traditional beliefs influence health seeking behaviour | Not specified                                                                        |
| Gupta et al., [47]<br><br>Rwanda | Not specified                                  | Retrospective | Three weeks to one year following the child's death | 2012 WHO VA tool                       | Not specified | Data was collected from multiple sources | Not specified | About 33% of the neonates did not visit a hospital during their illness and 39.9% did not receive treatment for the illness that                                                                                                                                                           | Accuracy of InterVA4 algorithm in identifying cause of death especially for neonates |

|                                               |                                                           |                    |                                               |                         |                                                                                                           |                                                                                                                                                                                                                                             |                               |                                                                                                                                                                                        |                               |
|-----------------------------------------------|-----------------------------------------------------------|--------------------|-----------------------------------------------|-------------------------|-----------------------------------------------------------------------------------------------------------|---------------------------------------------------------------------------------------------------------------------------------------------------------------------------------------------------------------------------------------------|-------------------------------|----------------------------------------------------------------------------------------------------------------------------------------------------------------------------------------|-------------------------------|
|                                               |                                                           |                    |                                               |                         |                                                                                                           |                                                                                                                                                                                                                                             |                               | <p>preceded their death</p> <p>Major causes of death were pneumonia and birth asphyxia among neonates, and among non-neonates - malaria, acute respiratory infections and HIV/AIDS</p> |                               |
| <p>Roder-DeWan et al., [45]</p> <p>Rwanda</p> | <p>Child mortality: Deaths of children aged 1-5 years</p> | <p>Prospective</p> | <p>3 weeks-1 year after the child's death</p> | <p>WHO 2012 VA tool</p> | <p>Three delays model</p> <p>Lancet Global Health Commission on High Quality Health Systems framework</p> | <p>Used a community-based triangulation method to capture the most marginalised families and to identify those that have left the catchment area after a child's death</p> <p>Regular debriefings during data collection and processing</p> | <p>Not specified for CHWs</p> | <p>Leading cause of death was malaria (39%), respiratory illness (14%) and acute abdomen (14%)</p> <p>Caregivers did not adhere to treatment plans</p>                                 | <p>Not specified for CHWs</p> |

|                                                 |                                       |                    |                      |                                                   |                            |                                                                                                                                                                                                      |                                         |                                                                                                                                                                                                                                                |                                         |
|-------------------------------------------------|---------------------------------------|--------------------|----------------------|---------------------------------------------------|----------------------------|------------------------------------------------------------------------------------------------------------------------------------------------------------------------------------------------------|-----------------------------------------|------------------------------------------------------------------------------------------------------------------------------------------------------------------------------------------------------------------------------------------------|-----------------------------------------|
| <p>Kallander et al., [51]</p> <p>Mozambique</p> | <p>Deaths in children 2-59 months</p> | <p>Prospective</p> | <p>Four months</p>   | <p>WHO VA tool</p> <p>INDEPTH Network SA tool</p> | <p>Pathway to survival</p> | <p>Structured regular supervision in the field throughout the data collection period, and all questionnaires were reviewed by the interviewers and their supervisors separately on a daily basis</p> | <p>Not specific to CHW notification</p> | <p>80% of deaths occurred at home; lack of caregiver awareness and recognition of illness symptoms</p> <p>Major causes of death are malaria (50.6%); HIV/AIDS related deaths (11.8%); diarrhoeal diseases and acute respiratory infections</p> | <p>Not specific to CHW notification</p> |
| <p>Nabukalu et al., [50]</p> <p>Uganda</p>      | <p>Not specified</p>                  | <p>Prospective</p> | <p>Not specified</p> | <p>WHO 2014 VA questionnaire</p>                  | <p>Not specified</p>       | <p>20% of the VA interviews performed by CHWs were directly observed by the trainers</p> <p>Inspection of completed questionnaires</p>                                                               | <p>Not specified</p>                    | <p>Leading causes of death were malaria (19.5%), prematurity (19.5%), neonatal pneumonia (15.6%),</p>                                                                                                                                          | <p>Not specified</p>                    |

|                                     |                                                |               |               |                                                                                                                             |               |                                                                               |                                                                  |                                                               |                                                                                                                                                                                                                                   |
|-------------------------------------|------------------------------------------------|---------------|---------------|-----------------------------------------------------------------------------------------------------------------------------|---------------|-------------------------------------------------------------------------------|------------------------------------------------------------------|---------------------------------------------------------------|-----------------------------------------------------------------------------------------------------------------------------------------------------------------------------------------------------------------------------------|
| Hutain et al., [35]<br>Sierra Leone | Neonatal deaths: deaths during 28 days of life | Prospective   | 6 months      | WHO 2007 VA Questionnaire; Population Health Metrics Research Consortium Shortened Questionnaire; WHO 2014 VA Questionnaire | Not specified | Not specified                                                                 | Sharing verbal autopsy findings increased care-seeking behaviour | Acute respiratory infections, malaria and neonatal conditions | Delays in data collection and capturing of CHW reports into the electronic vital registration systems<br><br>Incomplete data submitted by CHWs                                                                                    |
| Singogo et al., [29]<br>Malawi      | Not specified                                  | Retrospective | Not specified | Structured proforma                                                                                                         | Not specified | Village headmen birth registers were verified with facility records of births | Not specified                                                    | Not specified                                                 | Incompleteness of village health registers (66% were nearly 95% of data entered)<br><br>Insufficient supervision to ensure proper and complete documentation of vital events; no system in place to reconcile health facility and |



|                                        |               |             |               |                         |               |                                                                                                                                                                                                                                                                                                     |               |               |                                                                                                                                                                                                               |
|----------------------------------------|---------------|-------------|---------------|-------------------------|---------------|-----------------------------------------------------------------------------------------------------------------------------------------------------------------------------------------------------------------------------------------------------------------------------------------------------|---------------|---------------|---------------------------------------------------------------------------------------------------------------------------------------------------------------------------------------------------------------|
|                                        |               |             |               |                         |               |                                                                                                                                                                                                                                                                                                     |               |               | <p>village-related data</p> <p>High degree of illiteracy in village headmen</p>                                                                                                                               |
| <p>Joos et al., [33]</p> <p>Malawi</p> | Not specified | Prospective | Not specified | Village Health Register | Not specified | <p>Supervisors visited HSAs in their catchment area each month to check their extraction forms along with the registers</p> <p>Data quality guidelines reinforced during biannual data review meetings</p> <p>Household surveys conducted to assess the validity of the events reported by HSAs</p> | Not specified | Not specified | <p>Community based real time monitoring system did not accurately capture either the levels of, or trends in, childhood mortality. Health surveillance assistants underestimated under-five deaths by 49%</p> |

|                                           |                                                        |             |               |                                           |               |                                                                                                                                                                                                            |                                                                                                                                                            |               |                                                                                                      |
|-------------------------------------------|--------------------------------------------------------|-------------|---------------|-------------------------------------------|---------------|------------------------------------------------------------------------------------------------------------------------------------------------------------------------------------------------------------|------------------------------------------------------------------------------------------------------------------------------------------------------------|---------------|------------------------------------------------------------------------------------------------------|
| Munos et al., [36]<br><br>Mali            | Not specified                                          | Prospective | Not specified | Pregnancy, birth and death register       | Not specified | Monthly field visits to supervise the lay health volunteers<br><br>Verification of a sample of 10% sample of reported births and deaths in randomly selected village health registers                      | The community-based model in Mali produced estimates of the under-five mortality rate that were equivalent to those produced by the full pregnancy history | Not specified | Highly nomadic population<br><br>Follow-up on pregnancy outcomes was not done in a systematic manner |
| O'Connor et al., [54]<br><br>Sierra Leone | Children who die before reaching the age of five years | Prospective | Not specified | Standardised Ministry of Health materials | Not specified | Community discussions to improve CHW functionality                                                                                                                                                         | Communities meetings formulated strategies to enhance CHW motivation as well as quality and completeness of CHW monthly reports                            | Not specified | Underreporting of morbidity data and vital events by CHWs<br><br>Low rate of CHW report submission   |
| Amouzou et al., [34]<br><br>Malawi        | Not specified                                          | Prospective | Not specified | Village Health Register                   | Not specified | Supervisor checked the HSA's performance in completing the extraction forms and recording the births and deaths in the village health register<br>Supervisors provided on-the spot retraining and feedback | Not specified                                                                                                                                              | Not specified | Under-estimation of under-five mortality<br><br>Ensuring regular supervision of HSAs                 |

| Study               | Perceptions and acceptance                                                                                                                                                                                                                                                                                                                                                                                                                                                                                                                                                                                                                                                                                                                       | Challenges                                                                                                                                                                                                                                           |
|---------------------|--------------------------------------------------------------------------------------------------------------------------------------------------------------------------------------------------------------------------------------------------------------------------------------------------------------------------------------------------------------------------------------------------------------------------------------------------------------------------------------------------------------------------------------------------------------------------------------------------------------------------------------------------------------------------------------------------------------------------------------------------|------------------------------------------------------------------------------------------------------------------------------------------------------------------------------------------------------------------------------------------------------|
| Biswas et al., [62] | <p>Social autopsy added a new dimension to the work of health workers</p> <p>SA allowed the community to explore their own barriers and develop solutions</p> <p>SA was highly accepted at the community level since the community recognised SA as a powerful tool to promote preventative messages at the optimal time</p> <p>Local government leaders participating in SA sessions developed a sense of ownership and commitment to take responsibility for their respective community</p>                                                                                                                                                                                                                                                    | Challenges in involving more male participants, since in most cases they are the decision makers                                                                                                                                                     |
| Abebe et al., [57]  | <p>Clear messages from the Ministry imbued MDSR with a sense of prioritisation and urgency and thus respondents felt obliged to deliver MDSR as part of national plans</p> <p>Leadership at lower levels increased pressure for results</p> <p>Integration of MDSR into PHEM was seen to pool strengths from both teams and increase the likelihood of follow-up action</p> <p>At aggregate level, district, zonal or regional committees were seen to have increased their capacity to assess local patterns in maternal mortality</p> <p>Having reliable data on which to act, has led to improvement in documenting and managing case notes</p> <p>Availability of more detailed information strengthened communication across the health</p> | <p>Smooth introduction of MDSR was impeded by widespread fear that an increase in reported maternal deaths could lead to legal or disciplinary action</p> <p>There was still lack of clarity around how the two departments should work together</p> |

|  |                                                                                                        |  |
|--|--------------------------------------------------------------------------------------------------------|--|
|  | system, as well as between individual health providers, and between health authorities and communities |  |
|--|--------------------------------------------------------------------------------------------------------|--|
